# Supplementary material for: Cardiotrophin-1 determines liver engraftment of syngenic colon carcinoma cells through an immune system-mediated mechanism
Source: PubMed Central journal article supplement — Oncoimmunology. 2012 Dec 1;1(9):1527–36. doi: 10.4161/onci.22504 (PMC3525608; doi:10.4161/onci.22504), 2012-12-01
Supplement: onci-1-1527-s01.pdf [file onci-1-1527-s01.pdf]

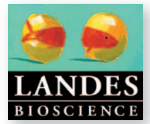

## **Supplemental Material to:**

**Matilde Bustos, Juan Dubrot, Eduardo Martinez-Anso, Eduardo Larequi, David Castaño, Asis Palazon, Idoia Belza, Miguel F. Sanmamed, Jose Luis Perez-Gracia, Carlos Ortiz de Solorzano, Carlos Alfaro and Ignacio Melero**

**Cardiotrophin-1 determines liver engraftment of a syngenic colon carcinoma cell line through an immune-mediated mechanism**

**Oncoimmunology 2012; 1(9)**

**<http://dx.doi.org/10.4161/onci.22504>**

**<http://www.landesbioscience.com/journals/oncoimmunology/article/22504/>**

# Supplementary figure 1

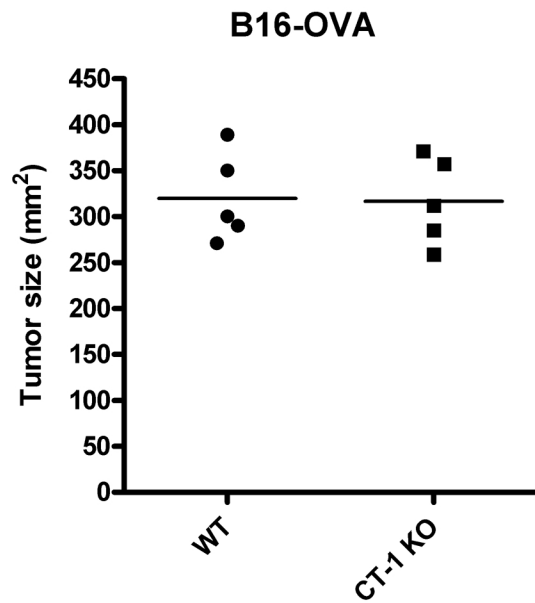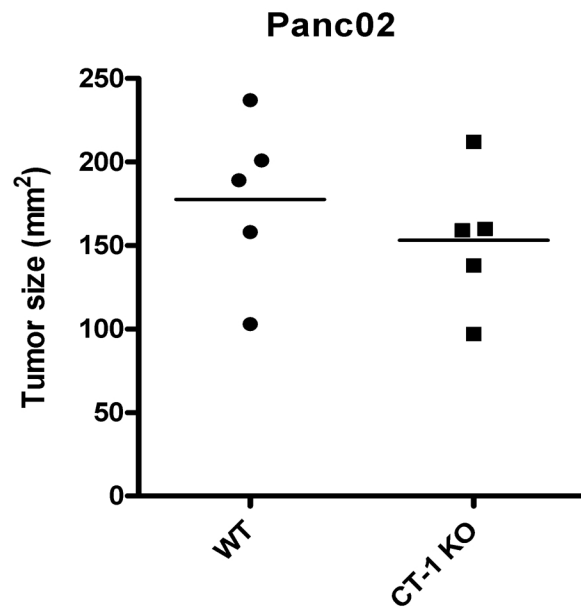

## Supplementary figure 2

**A**

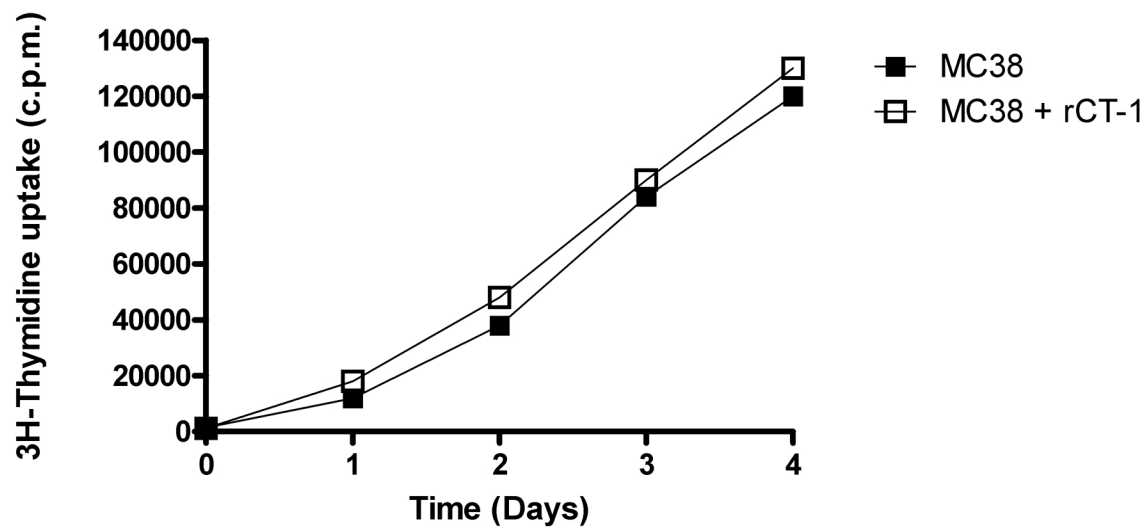

**B**

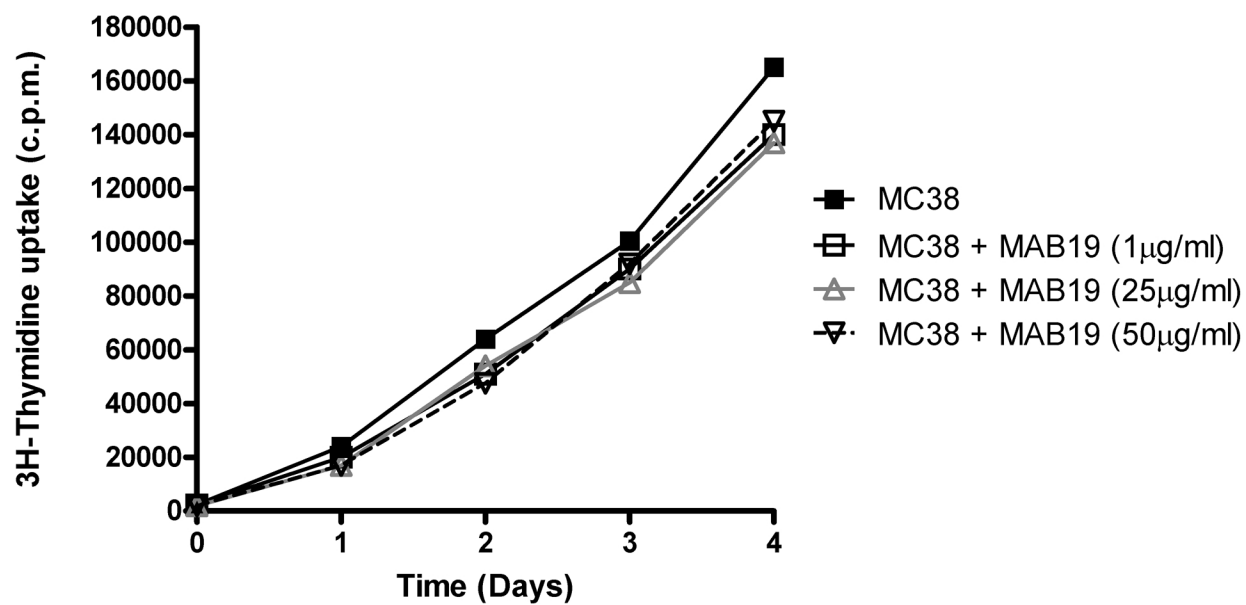

# Supplementary figure 3

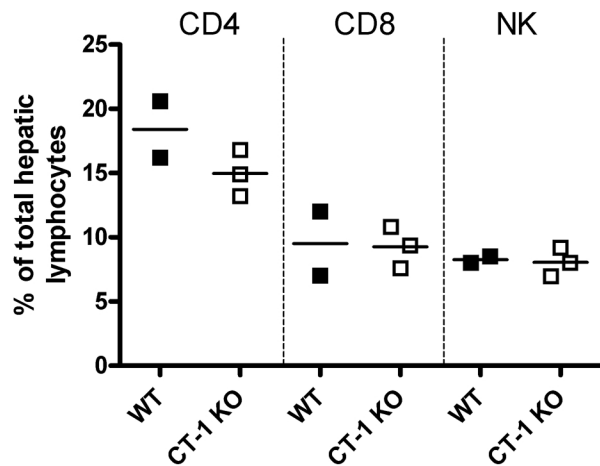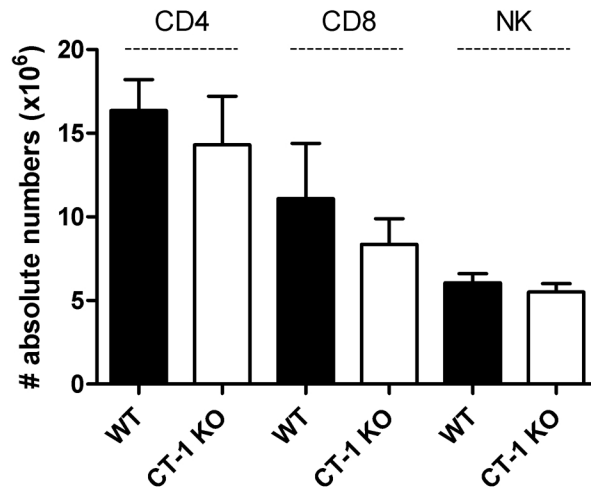

# Supplementary figure 4

## A

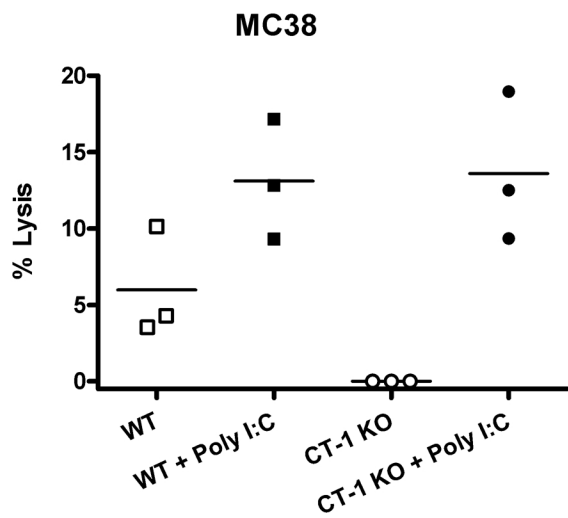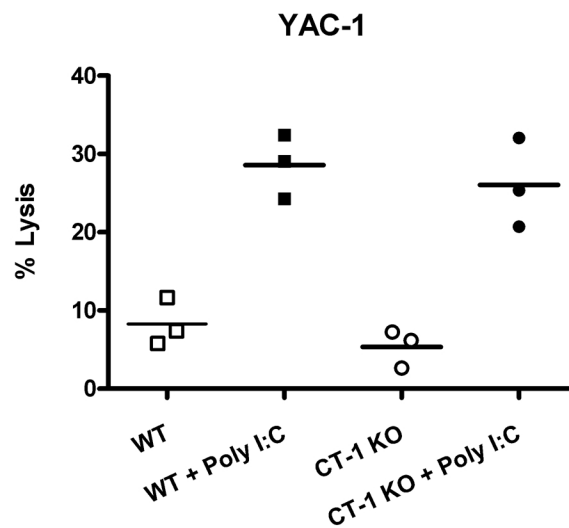

## B

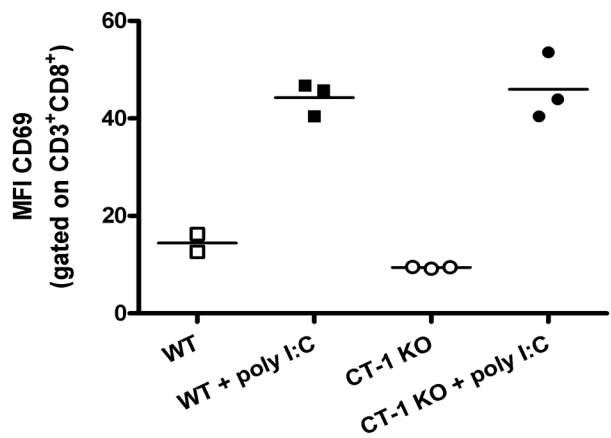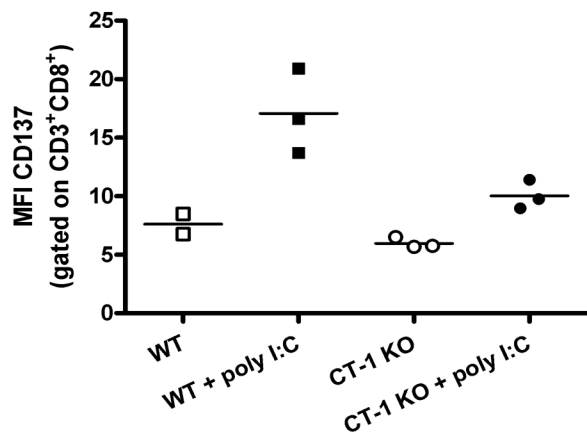

# Supplementary figure 5

## H-2K<sup>b</sup>

|   |                        | MFI  |         |        |
|---|------------------------|------|---------|--------|
|   |                        | MC38 | B16-OVA | Panc02 |
|   | Isotype control        | 9,03 | 4,37    | 5,12   |
| - | H2Kb (Basal)           | 18,5 | 2,89    | 5,39   |
| - | H2Kb (+ IFN $\gamma$ ) | 70,4 | 18,9    | 20,25  |

MC38

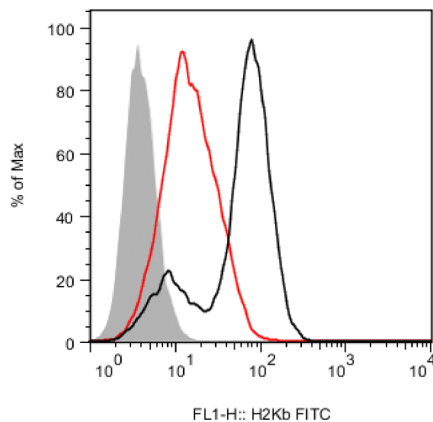

B16-OVA

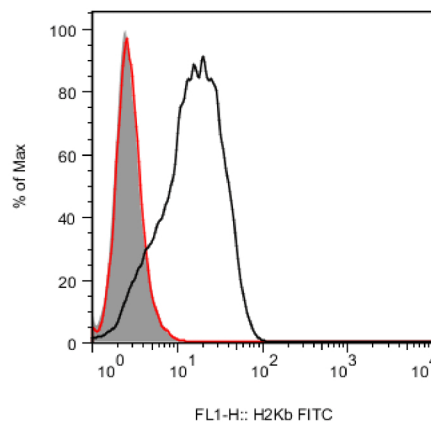

Panc02

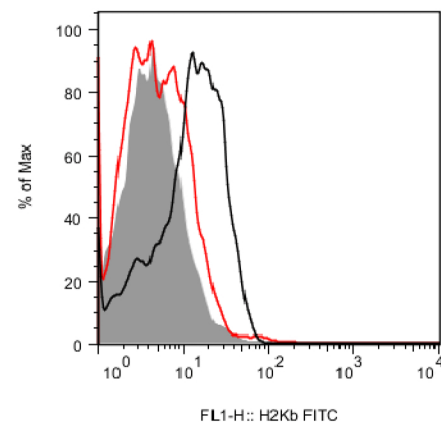

## H-2D<sup>b</sup>

|   |                        | MFI  |         |        |
|---|------------------------|------|---------|--------|
|   |                        | MC38 | B16-OVA | Panc02 |
|   | Isotype control        | 8,04 | 3,38    | 5,33   |
| - | H2Db (Basal)           | 29,3 | 3,91    | 5,05   |
| - | H2Db (+ IFN $\gamma$ ) | 36,6 | 9,37    | 20,4   |

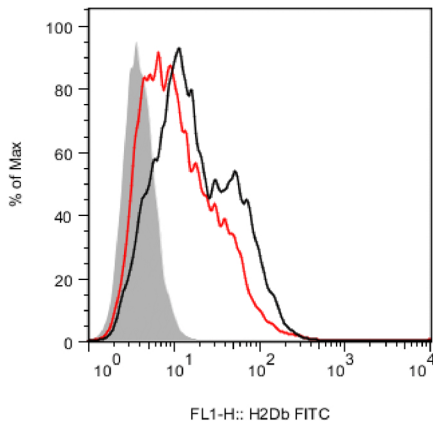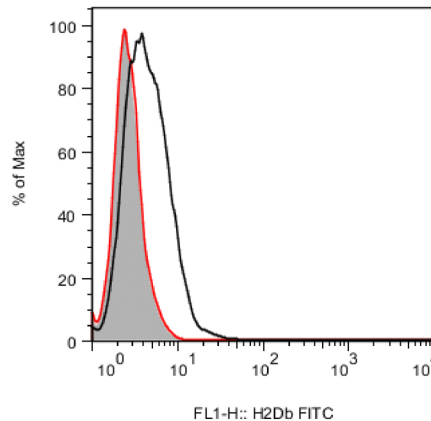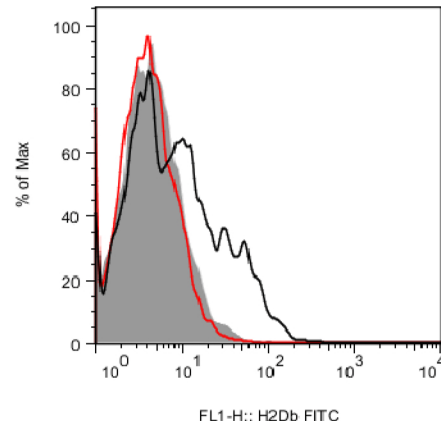

# Supplementary figure 6

**A**

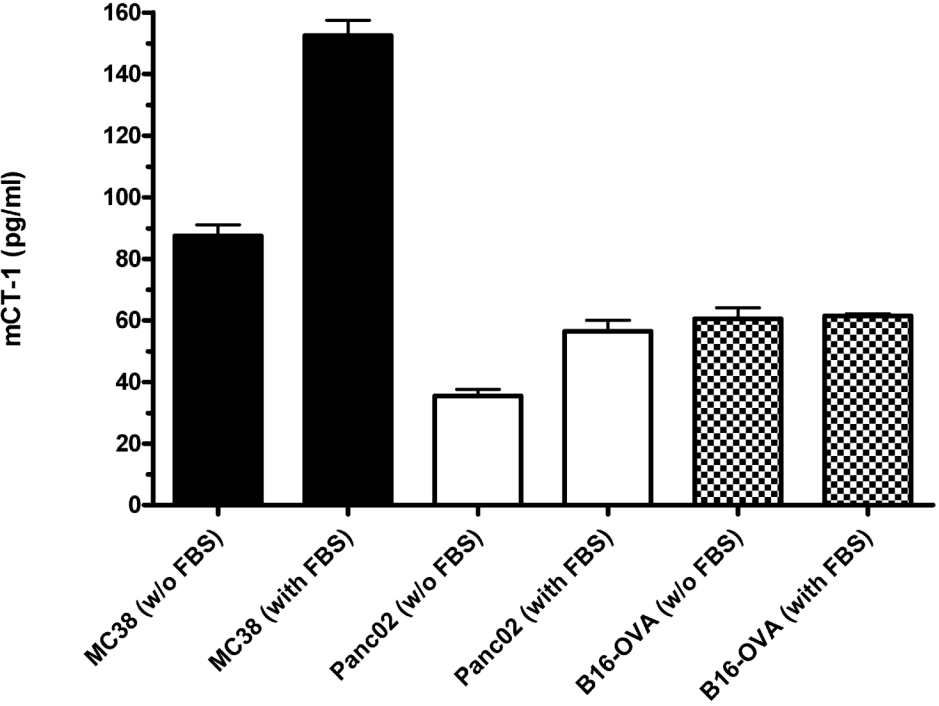

**B**

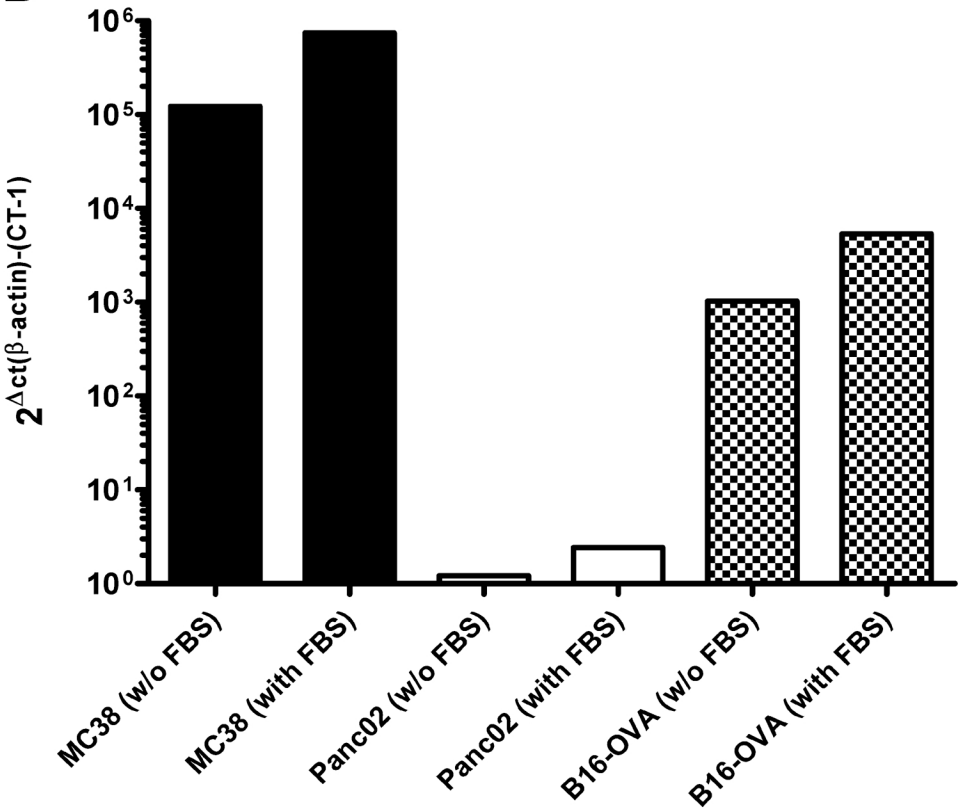

## Legends to Supplementary Figures

**Supplementary Figure 1. The resistance to the hepatic engraftment of tumor cells of *CT-I<sup>-/-</sup>* mice is not shared by other syngenic tumors.** Graphs show wild type (WT) and *CT-I<sup>-/-</sup>* mice inoculated with  $5 \times 10^6$  Panc02 and  $10^6$  B16-OVA carcinoma cells in the left lobe of the liver by laparotomy under anaesthesia and euthanized on day 14 to monitor the diameter of individual lesions on the surface of the liver.

**Supplementary Figure 2. CT-1 does not affect the growth of MC38 cells in culture.**

**A.** Experiments of *in vitro* of  $^3\text{H}$ -thymidine incorporation with MC38 cells treated or not with 100  $\mu\text{g}$  CT-1. **B.** Proliferation of MC38 cells cultured in RPMI 1640 with 10% FCS upon the addition of 1-50  $\mu\text{g}/\text{mL}$  of the anti-CT-1 neutralizing MAB19 antibody, when indicated.

**Supplementary Figure 3. The abundance of  $\text{CD4}^+$  ( $\text{CD3}^+ \text{CD4}^+$ ),  $\text{CD8}^+$  ( $\text{CD3}^+ \text{CD8}^+$ ), and NK cells ( $\text{CD3}^- \text{NK1.1}^+$ ) in the liver of wild type (WT) and *CT-I<sup>-/-</sup>* mice is comparable.** The livers of WT and *CT-I<sup>-/-</sup>* mice were excised and, upon collagenase D/DNAse I digestion, a Percoll gradient was carried out to isolate the leukocyte population. Graphs show the percentage of total hepatic lymphocytes (left) and absolute numbers (right) of  $\text{CD4}^+$ ,  $\text{CD8}^+$  and NK cells.

**Supplementary Figure 4. Hepatic lymphocytes from *CT-I<sup>-/-</sup>* and wild type (WT) mice exert comparable spontaneous tumor cytotoxicity.**

**A.** Total hepatic leukocytes were isolated as described in **Supplementary Figure 3** to measure cytolytic activity in five-hour  $^{51}\text{Cr}$  release assays. Where indicated, wild type or *CT-I<sup>-/-</sup>* were mice injected or not with 100  $\mu\text{g}$  polyI:C *i.v.* to enhance the activity of NK cells. Lymphocytes were co-cultured with  $^{51}\text{Cr}$ -labeled MC38 (left panel) or YAC-1 (right panel) cells at 5:1



effector:target ratio. **B.** Levels of CD69 (left panel) and CD137 (right panel) activation markers on the surface of the CD3<sup>+</sup> CD8<sup>+</sup> population from WT and *CT-1*<sup>-/-</sup> mice pre-treated or not with polyI:C.

**Supplementary Figure 5. Analysis of MHC class I expression on MC38, Panc02 and B16-OVA cells.** Surface expression of H-2K<sup>b</sup> and H-2D<sup>b</sup> molecules on the indicated cell lines was examined by flow cytometry. Figure shows the FACS histograms and MFI of baseline (red line) MHC class I expression or the levels detected upon the addition of 1,000 U/mL interferon  $\gamma$  (IFN $\gamma$ ) during the last 48h of culture (black line). The corresponding isotype-matched background staining is provided.

**Supplementary Figure 6. Production of CT-1 by tumor cell lines.** **A.** ELISA determination of the concentration of mouse CT-1 in the supernatants of MC38, Panc02 and B16-OVA cultured cells. All cells were cultured either with or without fetal bovine serum (FBS), as indicated. **B.** *CT-1* mRNA was quantified by RT-PCR in tumor cells cultured as in **A.**
